# Supplementary material for: Burst-Time-Dependent Plasticity Robustly Guides ON/OFF Segregation in the Lateral Geniculate Nucleus
Source: PubMed Central journal article supplement (PMC2790088; doi:10.1371/journal.pcbi.1000618), 2009-12-24
Supplement: pcbi.1000618.s002.pdf [file pcbi.1000618.s002.pdf]

**Table S1.** Segregation results using a numerical simulation of STDP ( $\tau_+ = \tau_- = 20$  ms) [1] and BTDP ( $\tau_+ = 500$  ms) [2] for 15 data sets of retinal wave activity in ferret (P16-P24) studied by Lee et al. [3]. Postsynaptic activity of the LGN neuron was generated using the quadratic integrate-and-fire neuron by Izhikevich [4]. This table lists the minimum depression-to-potential ratio  $R = A_-/A_+$  in STDP needed for segregation, a range of the depression-to-potential ratios  $R = I/A_+$  in BTDP which resulted in segregation, as well as the cell type which won the competition in each case. For set 4, different ranges of  $R$  in BTDP resulted in two segregation outcomes.

| Set Number | min $R$ for STDP | STDP outcome | Range of $R$ for BTDP  | BTDP outcome |
|------------|------------------|--------------|------------------------|--------------|
| 1          | 1.8              | OFF          | 0.01-0.15              | OFF          |
| 2          | 2.5              | OFF          | 0.13-0.30              | OFF          |
| 3          | 1.7              | ON           | 0.05-0.45              | ON           |
| 4          | 2.0              | OFF          | 0.05-0.27<br>0.28-0.45 | OFF<br>ON    |
| 5          | 1.8              | OFF          | 0.07-0.26              | OFF          |
| 6          | 1.5              | OFF          | 0.03-0.30              | OFF          |
| 7          | 6.6              | OFF          | 0.03-0.20              | OFF          |
| 8          | 2.1              | OFF          | 0.11-0.25              | OFF          |
| 9          | 1.8              | OFF          | 0.03-0.28              | OFF          |
| 10         | 1.9              | OFF          | 0.10-0.32              | OFF          |
| 11         | 3.5              | OFF          | 0.09-0.35              | OFF          |
| 12         | 2.5              | ON           | 0.25-0.35              | OFF          |
| 13         | 2.4              | ON           | 0.05-0.29              | ON           |
| 14         | 2.1              | OFF          | 0.05-0.25              | OFF          |
| 15         | 3.6              | OFF          | 0.01-0.59              | OFF          |

## References

1. Song S, Miller KD, Abbott LF (2000) Competitive Hebbian learning through spike-timing-dependent synaptic plasticity. *Nat Neurosci* 3: 919–926.
2. Butts DA, Kanold PO, Shatz CJ (2007) A burst-based “Hebbian” learning rule at retinogeniculate synapses links retinal waves to activity-dependent refinement. *PLoS Biol* 5: 0651–0661.
3. Lee CW, Eglen SJ, Wong ROL (2002) Segregation of ON and OFF retinogeniculate connectivity directed by patterned spontaneous activity. *J Neurophysiol* 88: 2311–2321.
4. Izhikevich E (2003) Simple model of spiking neurons. *IEEE Trans Neur Net* 14: 1569–1572.
