# Supplementary material for: Burst-Time-Dependent Plasticity Robustly Guides ON/OFF Segregation in the Lateral Geniculate Nucleus
Source: PubMed Central journal article supplement (PMC2790088; doi:10.1371/journal.pcbi.1000618), 2009-12-24
Supplement: pcbi.1000618.s003.pdf [file pcbi.1000618.s003.pdf]

**Table S2.** Peak amplitudes and decay time constants of the symmetric fall-off exponential fits to the correlation functions for each input pair in each data set from spontaneous retinal activity recordings in ferret [1], fitted using a nonlinear least squares routine in R (values given as estimate  $\pm$  standard error). Since each data consisted of one ON and one OFF recording, the same type cell correlations are auto-correlations and are all centered at 0. Therefore  $d_{\text{ON}/\text{ON}} = d_{\text{OFF}/\text{OFF}} = 0$  in the table are not listed. Labels are similar to Table 1 (main text).

| Set Number | $A_{\text{ON}/\text{ON}}$ | $\tau_{\text{ON}/\text{ON}}$ | $A_{\text{OFF}/\text{OFF}}$ | $\tau_{\text{OFF}/\text{OFF}}$ | $A_{\text{ON}/\text{OFF}}$ | $\tau_{\text{ON}/\text{OFF}}$ | $d_{\text{ON}/\text{OFF}}$ |
|------------|---------------------------|------------------------------|-----------------------------|--------------------------------|----------------------------|-------------------------------|----------------------------|
| 1          | $0.010 \pm 0.001$         | $1.126 \pm 0.096$            | $0.237 \pm 0.004$           | $21.658 \pm 3.084$             | $0.021 \pm 0.001$          | $7.797 \pm 0.651$             | $0.215 \pm 0.116$          |
| 2          | $0.230 \pm 0.005$         | $0.725 \pm 0.023$            | $0.163 \pm 0.004$           | $1.696 \pm 0.051$              | $0.121 \pm 0.003$          | $1.775 \pm 0.061$             | $-0.005 \pm 0.020$         |
| 3          | $0.450 \pm 0.008$         | $0.506 \pm 0.012$            | $0.009 \pm 0.001$           | $0.218 \pm 0.020$              | $0.035 \pm 0.001$          | $0.576 \pm 0.021$             | $-0.229 \pm 0.011$         |
| 4          | $0.594 \pm 0.010$         | $0.640 \pm 0.015$            | $0.486 \pm 0.010$           | $2.590 \pm 0.083$              | $0.323 \pm 0.003$          | $1.943 \pm 0.029$             | $-0.424 \pm 0.013$         |
| 5          | $0.006 \pm 0.000$         | $0.335 \pm 0.030$            | $0.018 \pm 0.002$           | $1.107 \pm 0.073$              | $0.006 \pm 0.000$          | $0.807 \pm 0.054$             | $0.278 \pm 0.027$          |
| 6          | $0.009 \pm 0.000$         | $0.538 \pm 0.030$            | $0.081 \pm 0.002$           | $3.505 \pm 0.169$              | $0.013 \pm 0.000$          | $2.520 \pm 0.113$             | $0.057 \pm 0.047$          |
| 7          | $0.016 \pm 0.001$         | $0.513 \pm 0.036$            | $0.050 \pm 0.001$           | $3.119 \pm 0.151$              | $0.010 \pm 0.000$          | $3.266 \pm 0.200$             | $-0.977 \pm 0.072$         |
| 8          | $0.190 \pm 0.003$         | $3.810 \pm 0.102$            | $0.186 \pm 0.003$           | $7.015 \pm 0.312$              | $0.151 \pm 0.002$          | $6.702 \pm 0.303$             | $0.529 \pm 0.063$          |
| 9          | $0.047 \pm 0.001$         | $1.080 \pm 0.038$            | $1.039 \pm 0.020$           | $6.802 \pm 0.373$              | $0.156 \pm 0.002$          | $1.392 \pm 0.025$             | $0.080 \pm 0.013$          |
| 10         | $0.057 \pm 0.001$         | $0.652 \pm 0.022$            | $0.201 \pm 0.004$           | $1.543 \pm 0.042$              | $0.085 \pm 0.001$          | $1.249 \pm 0.028$             | $-0.208 \pm 0.014$         |
| 11         | $0.514 \pm 0.006$         | $0.839 \pm 0.014$            | $0.061 \pm 0.003$           | $3.433 \pm 0.292$              | $0.106 \pm 0.002$          | $2.571 \pm 0.070$             | $-1.143 \pm 0.028$         |
| 12         | $0.077 \pm 0.002$         | $1.071 \pm 0.035$            | $0.645 \pm 0.008$           | $1.284 \pm 0.021$              | $0.166 \pm 0.003$          | $1.561 \pm 0.042$             | $-0.432 \pm 0.020$         |
| 13         | $0.054 \pm 0.002$         | $1.963 \pm 0.113$            | $0.007 \pm 0.000$           | $0.781 \pm 0.061$              | $0.011 \pm 0.000$          | $1.660 \pm 0.093$             | $-0.152 \pm 0.045$         |
| 14         | $0.018 \pm 0.001$         | $0.502 \pm 0.026$            | $0.094 \pm 0.002$           | $1.948 \pm 0.055$              | $0.022 \pm 0.001$          | $1.264 \pm 0.054$             | $-0.055 \pm 0.027$         |
| 15         | $0.005 \pm 0.000$         | $0.907 \pm 0.090$            | $0.241 \pm 0.008$           | $2.624 \pm 0.131$              | $0.014 \pm 0.000$          | $4.332 \pm 0.272$             | $0.325 \pm 0.081$          |

## References

1. Lee CW, Eglen SJ, Wong ROL (2002) Segregation of ON and OFF retinogeniculate connectivity directed by patterned spontaneous activity. J Neurophysiol 88: 2311–2321.
